# Supplementary material
Source: PubMed Central journal article supplement (PMC6051535)
Supplement: NIHMS922664-supplement-1.pdf [file NIHMS922664-supplement-1.pdf]

|                                   | Training Set        |            | Validation Set      |            | Testing Set         |            | Independent Testing Set |            |
|-----------------------------------|---------------------|------------|---------------------|------------|---------------------|------------|-------------------------|------------|
|                                   | HUP + TCIA, n = 813 |            | HUP + TCIA, n = 102 |            | HUP + TCIA, n = 102 |            | BWH, n = 471            |            |
| Age                               | <u>Accuracy</u>     | <u>AUC</u> | <u>Accuracy</u>     | <u>AUC</u> | <u>Accuracy</u>     | <u>AUC</u> | <u>Accuracy</u>         | <u>AUC</u> |
| FLAIR network                     | 83.0%               | .89        | 73.5%               | .83        | 82.4%               | .86        | 77.7%                   | .86        |
| T2 network                        | 68.3%               | .74        | 63.7%               | .68        | 70.6%               | .75        | 58.2%                   | .70        |
| T1 pre-contrast network           | 62.4%               | .64        | 64.7%               | .73        | 69.6%               | .64        | 62.0%                   | .72        |
| T1 post-contrast network          | 72.8%               | .81        | 76.5%               | .76        | 77.5%               | .88        | 58.8%                   | .76        |
| Combining modality networks       | 83.5%               | .90        | 83.3%               | .93        | 87.3%               | .96        | 65.0%                   | .82        |
| Combining modality networks + age | 83.8%               | .91        | 80.4%               | .92        | 90.2%               | .97        | 67.1%                   | .86        |
| Combining modality networks + age | 89.4%               | .95        | 79.4%               | .92        | 91.2%               | .97        | 77.5%                   | .90        |
|                                   | HUP + BWH, n = 858  |            | HUP + BWH, n = 111  |            | HUP + BWH, n = 105  |            | TCIA, n = 414           |            |
| Age                               | <u>Accuracy</u>     | <u>AUC</u> | <u>Accuracy</u>     | <u>AUC</u> | <u>Accuracy</u>     | <u>AUC</u> | <u>Accuracy</u>         | <u>AUC</u> |
| FLAIR network                     | 83.6%               | .88        | 83.8%               | .91        | 82.9%               | .92        | 78.3%                   | .85        |
| T2 network                        | 69.1%               | .77        | 60.4%               | .72        | 71.4%               | .75        | 67.6%                   | .73        |
| T1 pre-contrast network           | 71.2%               | .77        | 65.8%               | .78        | 66.7%               | .74        | 55.8%                   | .56        |
| T1 post-contrast network          | 68.8%               | .78        | 76.6%               | .73        | 72.4%               | .88        | 65.5%                   | .74        |
| Combining modality networks       | 76.5%               | .85        | 74.8%               | .83        | 81.0%               | .89        | 79.5%                   | .85        |
| Combining modality networks       | 81.4%               | .90        | 78.4%               | .89        | 83.8%               | .91        | 79.0%                   | .87        |
| Combining modality networks + age | 86.7%               | .94        | 85.6%               | .96        | 89.5%               | .94        | 84.5%                   | .91        |
|                                   | TCIA + BWH, n = 705 |            | TCIA + BWH, n = 93  |            | TCIA + BWH, n = 87  |            | HUP, n = 603            |            |
| Age                               | <u>Accuracy</u>     | <u>AUC</u> | <u>Accuracy</u>     | <u>AUC</u> | <u>Accuracy</u>     | <u>AUC</u> | <u>Accuracy</u>         | <u>AUC</u> |
| FLAIR network                     | 81.3%               | .86        | 83.9%               | .89        | 82.8%               | .88        | 84.1%                   | .90        |
| T2 network                        | 67.2%               | .75        | 66.7%               | .69        | 63.2%               | .64        | 63.5%                   | .65        |
| T1 pre-contrast network           | 69.2%               | .78        | 68.8%               | .71        | 69.0%               | .75        | 65.3%                   | .73        |
| T1 post-contrast network          | 69.4%               | .79        | 68.8%               | .73        | 63.2%               | .83        | 72.5%                   | .75        |
| Combining modality networks       | 75.0%               | .82        | 77.4%               | .85        | 81.6%               | .89        | 68.5%                   | .85        |
| Combining modality networks       | 80.4%               | .89        | 77.4%               | .87        | 77.0%               | .89        | 74.8%                   | .83        |
| Combining modality networks + age | 85.4%               | .92        | 87.1%               | .96        | 89.7%               | .94        | 84.1%                   | .91        |
|                                   | Average             |            | Average             |            | Average             |            | Average                 |            |
| Age                               | <u>Accuracy</u>     | <u>AUC</u> | <u>Accuracy</u>     | <u>AUC</u> | <u>Accuracy</u>     | <u>AUC</u> | <u>Accuracy</u>         | <u>AUC</u> |
| FLAIR network                     | 82.7%               | .88        | 80.4%               | .88        | 82.7%               | .89        | 80.5%                   | .87        |
| T2 network                        | 68.3%               | .75        | 63.4%               | .70        | 68.7%               | .72        | 63.0%                   | .69        |
| T1 pre-contrast network           | 67.6%               | .73        | 66.3%               | .74        | 68.4%               | .71        | 61.6%                   | .68        |
| T1 post-contrast network          | 70.3%               | .79        | 74.2%               | .74        | 71.4%               | .87        | 66.2%                   | .75        |
| Combining modality networks       | 78.5%               | .86        | 78.4%               | .87        | 83.4%               | .91        | 70.4%                   | .84        |
| Combining modality networks       | 81.9%               | .90        | 78.8%               | .89        | 84.0%               | .92        | 73.5%                   | .85        |
| Combining modality networks + age | 87.2%               | .94        | 84.0%               | .95        | 90.1%               | .95        | 82.1%                   | .91        |

Supplemental Table 1. Training, validation, testing, and independent testing set performance from training on two patient cohorts using the sequence networks training heuristic.

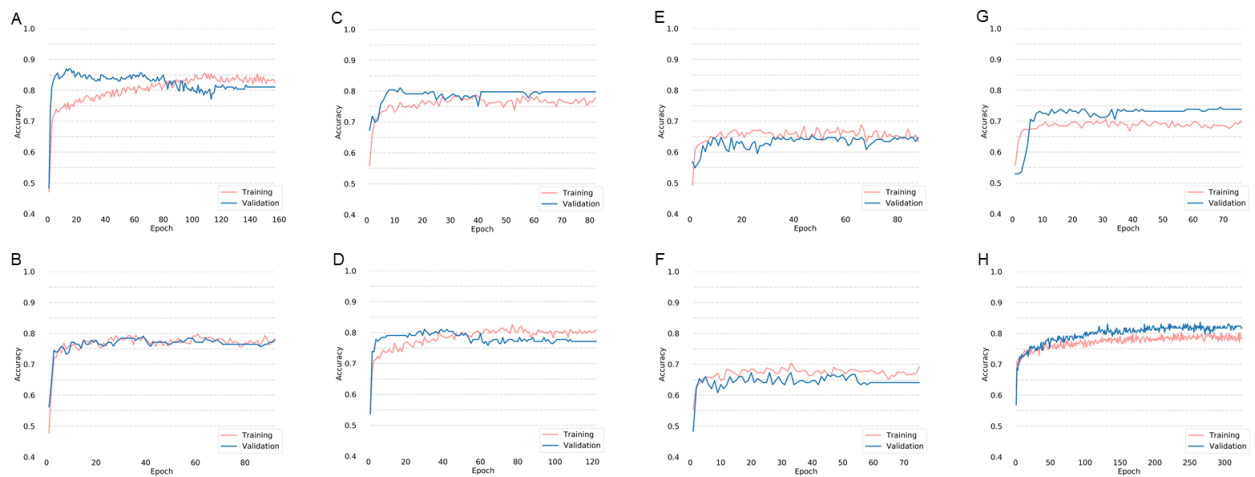

Supplemental Fig 1. Training and validation accuracy for three patient cohort training for (A) single combined network, (B) coronal network, (C) sagittal network, (D) axial network, (E) FLAIR network, (F) T2 network, (G) T1 pre-contrast network, and (H) T1 post-contrast network. Training accuracy shown is for augmented training data.

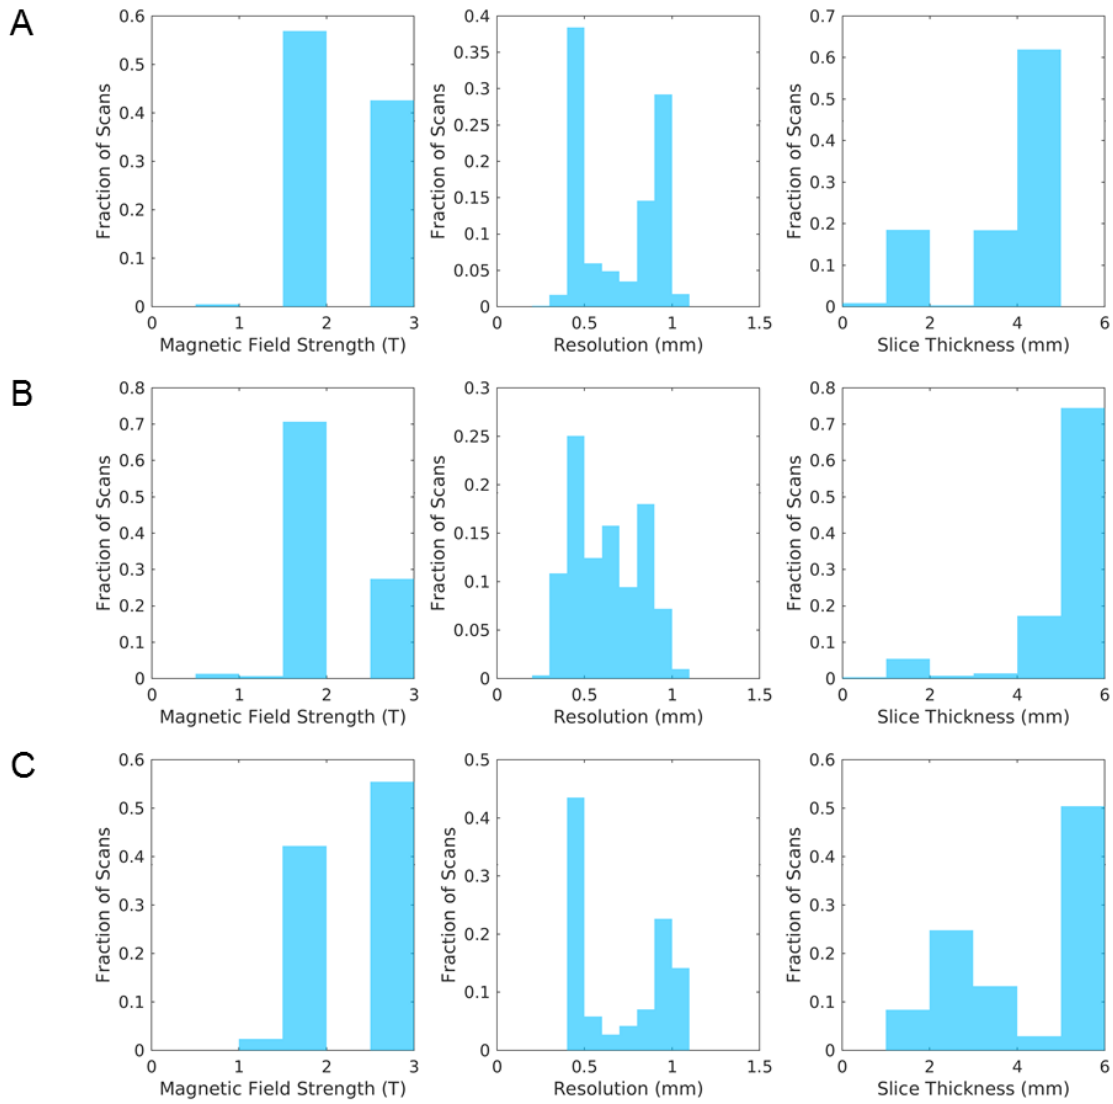

Supplemental Fig 2. Magnetic field strength, resolution, and slice thickness of (a) HUP, (b) BWH, and (c) TCIA cohorts for FLAIR, T2, T1 pre-contrast, and T1 post-contrast MR images.

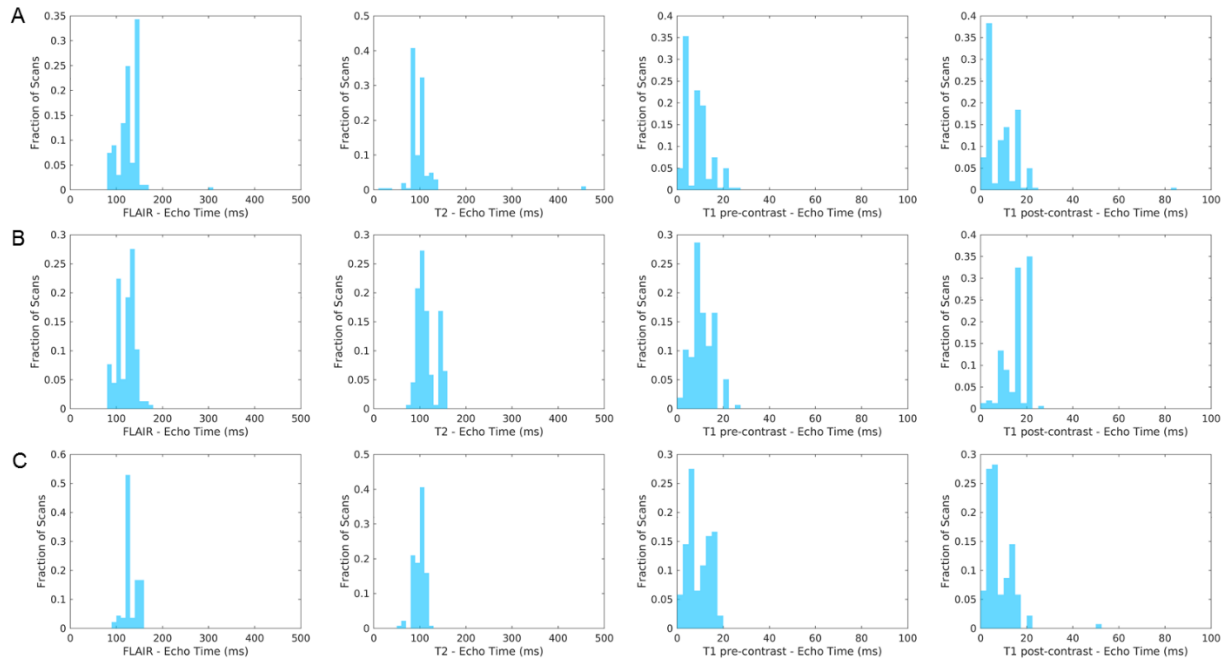

Supplemental Fig 3. Echo time for FLAIR, T2, T1 pre-contrast, and T1 post-contrast MRI images of (a) HUP, (b) BWH, and (c) TCIA cohorts.

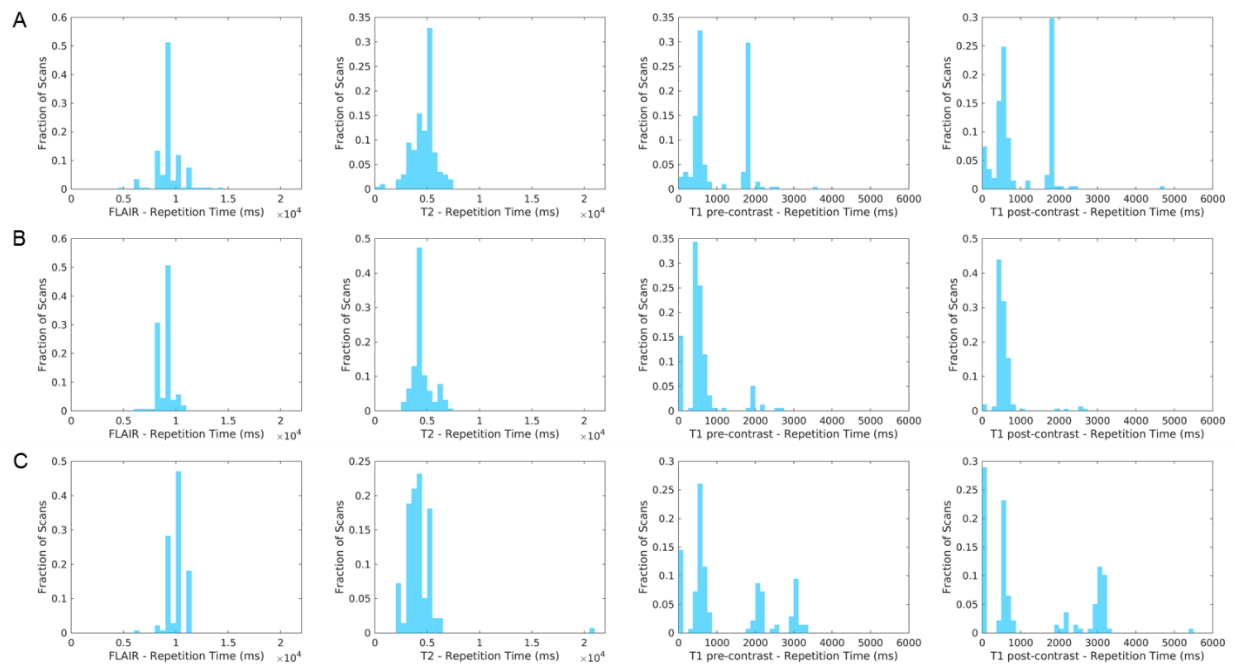

Supplemental Fig 4. Repetition time for FLAIR, T2, T1 pre-contrast, and T1 post-contrast MRI images of (a) HUP, (b) BWH, and (c) TCIA cohorts.
